# Supplementary material
Source: Springer Nature journal article supplement (https://www.springermedizin.de/resource/supplementary/12879_2011_1761_MOESM1_ESM.pdf/9443976)
Supplement: MOESM1 [file 9443976]

**16 community clusters, 5821 participants**

66% (3863) Females

34% (1958) Males

**PREVIOUS HIV TESTING**

**Yes:** 32% (1833/5821)

**No:** 68% (3988/5821)

**Males (N= 1958)**

HIV tested: 17% (323/1958)

**Females (N= 3863)**

HIV tested: 39% (1510/3863)

**Reported testing locations**

**Reported testing locations**

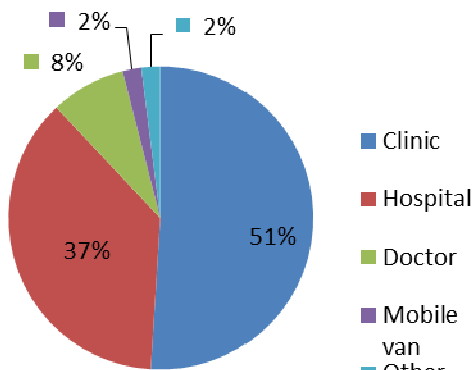

**Men**

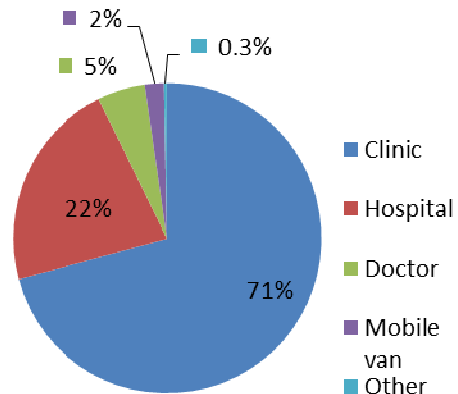

**Women**
